# Supplementary material
Source: Springer Nature journal article supplement (https://www.springermedizin.de/resource/supplementary/12889_2006_361_MOESM1_ESM.pdf/9501374)

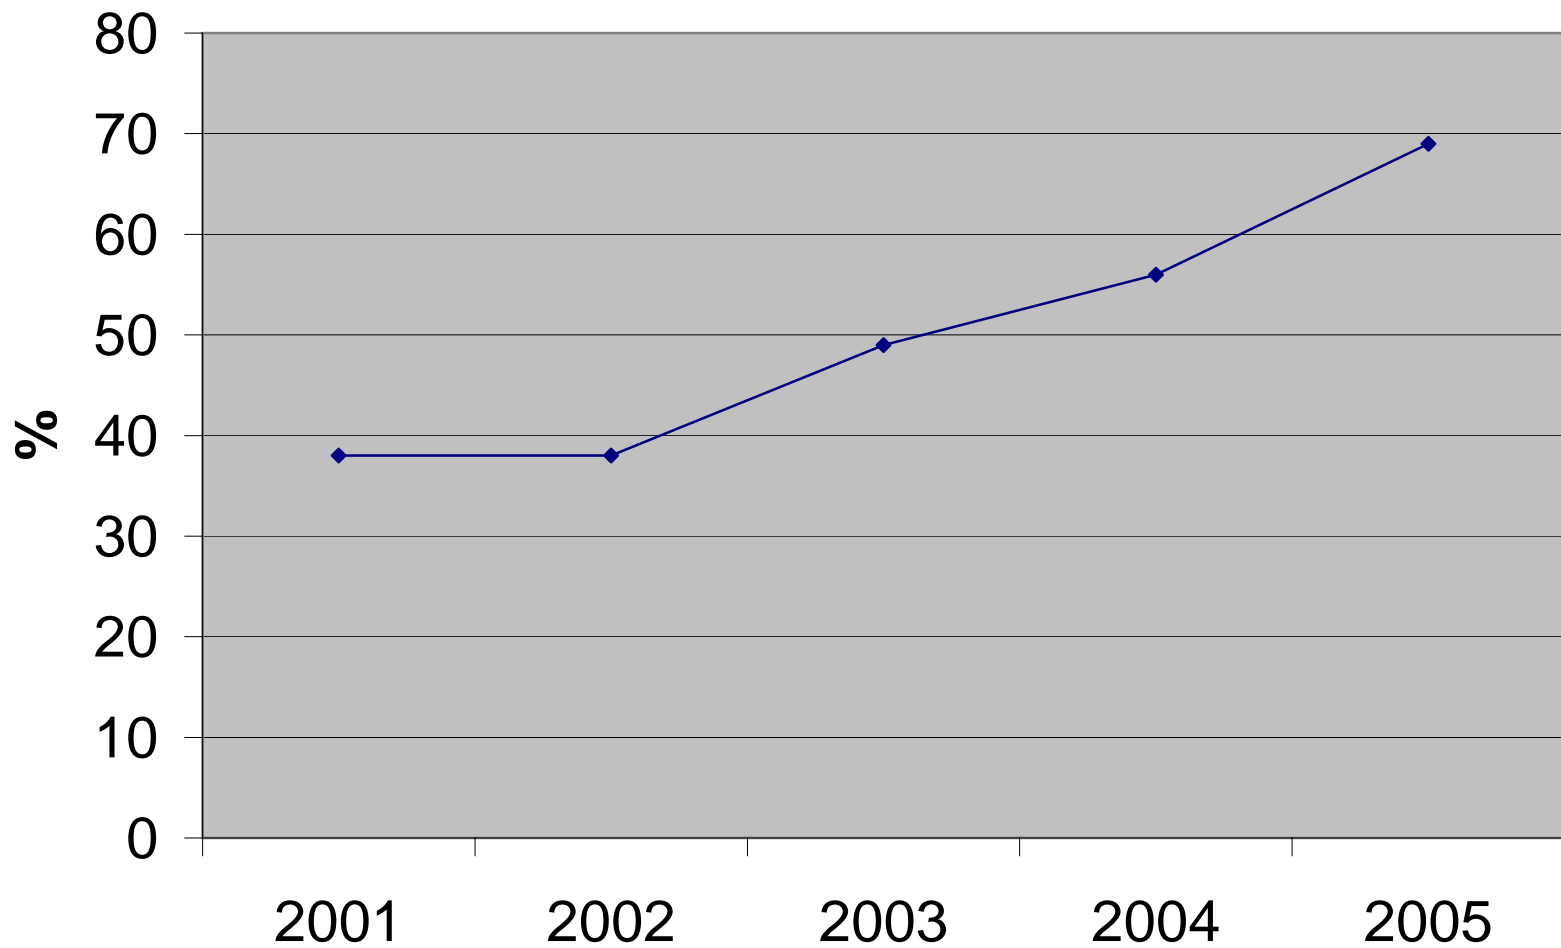

Supplement: MOESM1 [file 9501374]
